# Supplementary material for: Infection with Helicobacter pylori Induces Epithelial to Mesenchymal Transition in Human Cholangiocytes
Source: MDPI journal article supplement (doi:10.3390/pathogens9110971), 2020-11-21
Supplement: s1 [file s1]

## Supplementary Materials

The following are available online at [www.mdpi.com/xxx/s1](http://www.mdpi.com/xxx/s1),

**Figure S1.** TGF- $\beta$  promoted nodule formation. TGF- $\beta$ , an EMT-stimulant, induced nodule formation of H69 cholangiocytes. Cells were cultured in the presence of 5 ng/ml TGF- $\beta$  in serum- and hormone-free medium for 24 hours. Micrographs at 0 (left) and 24 (right) hours; 5 $\times$ magnification.

**Figure S2.** Size of colonies of cholangiocytes in soft agar. Colonies with a diameter  $\geq 50$   $\mu\text{m}$  were counted and the diameter measured; mean values were 77.63, 91.62, 95.25 and 81.46  $\mu\text{m}$  diameter at MOI of 0, 10, 50, and 100, respectively.

**Figure S3.** Growth of *Helicobacter bilis*-infected cholangiocytes as determined by the xCELLigence approach. H69 cells were exposed to increasing numbers of *H. bilis* (ATCC 43879) at MOI of 0, 10, 50, and 100. Cell growth was inhibited when compared to the uninfected cells, at all MOIs. Assay was performed in E-plates in minimal (serum-depleted) medium [97].

**Table S1.** Nucleotide sequences of primers specific for human EMT-associated and cancer stem cell marker genes.

Figure S1

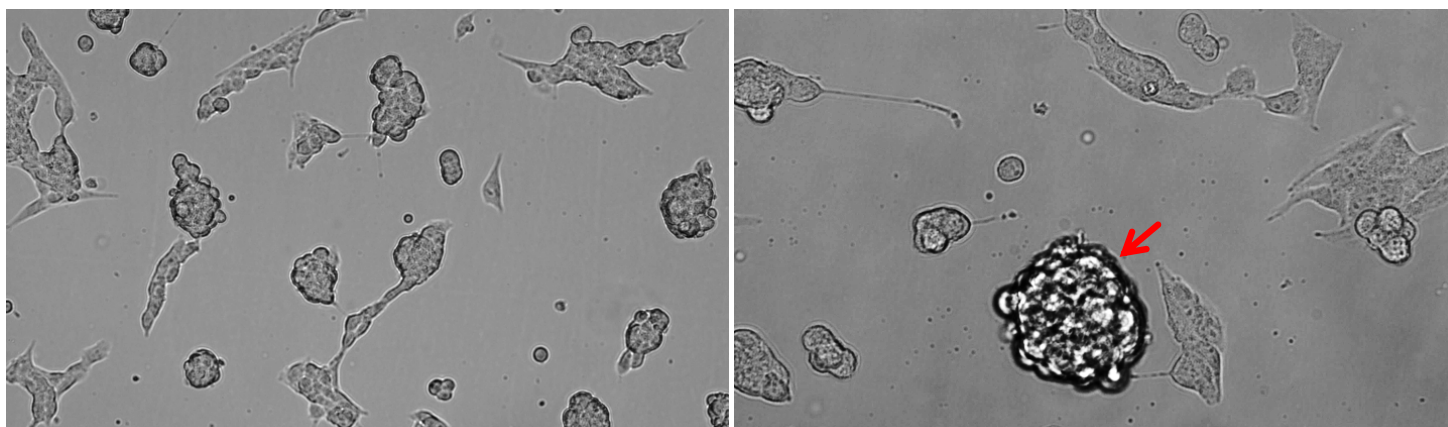

Figure S2

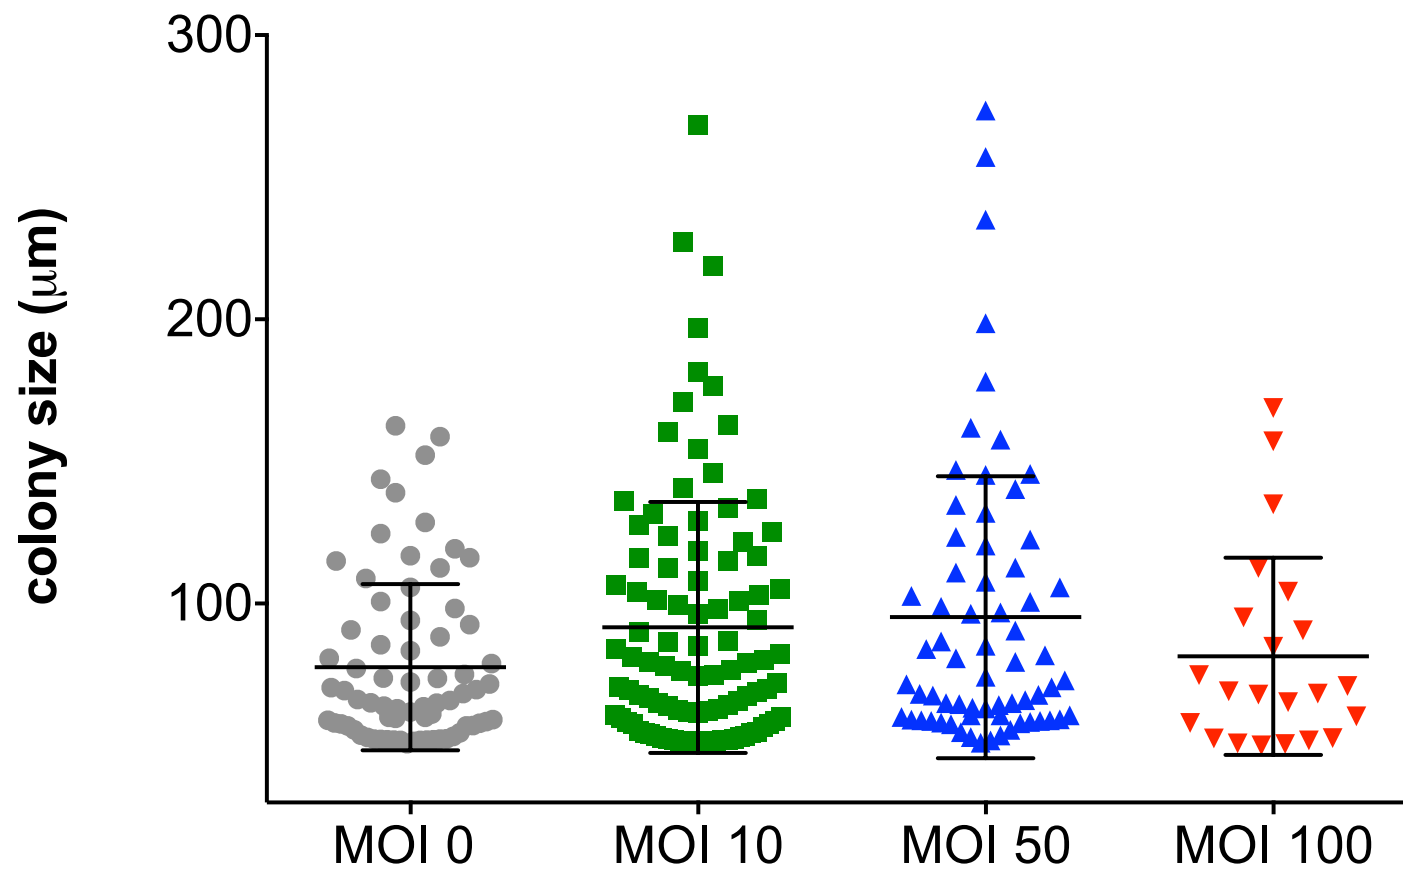

Figure S3

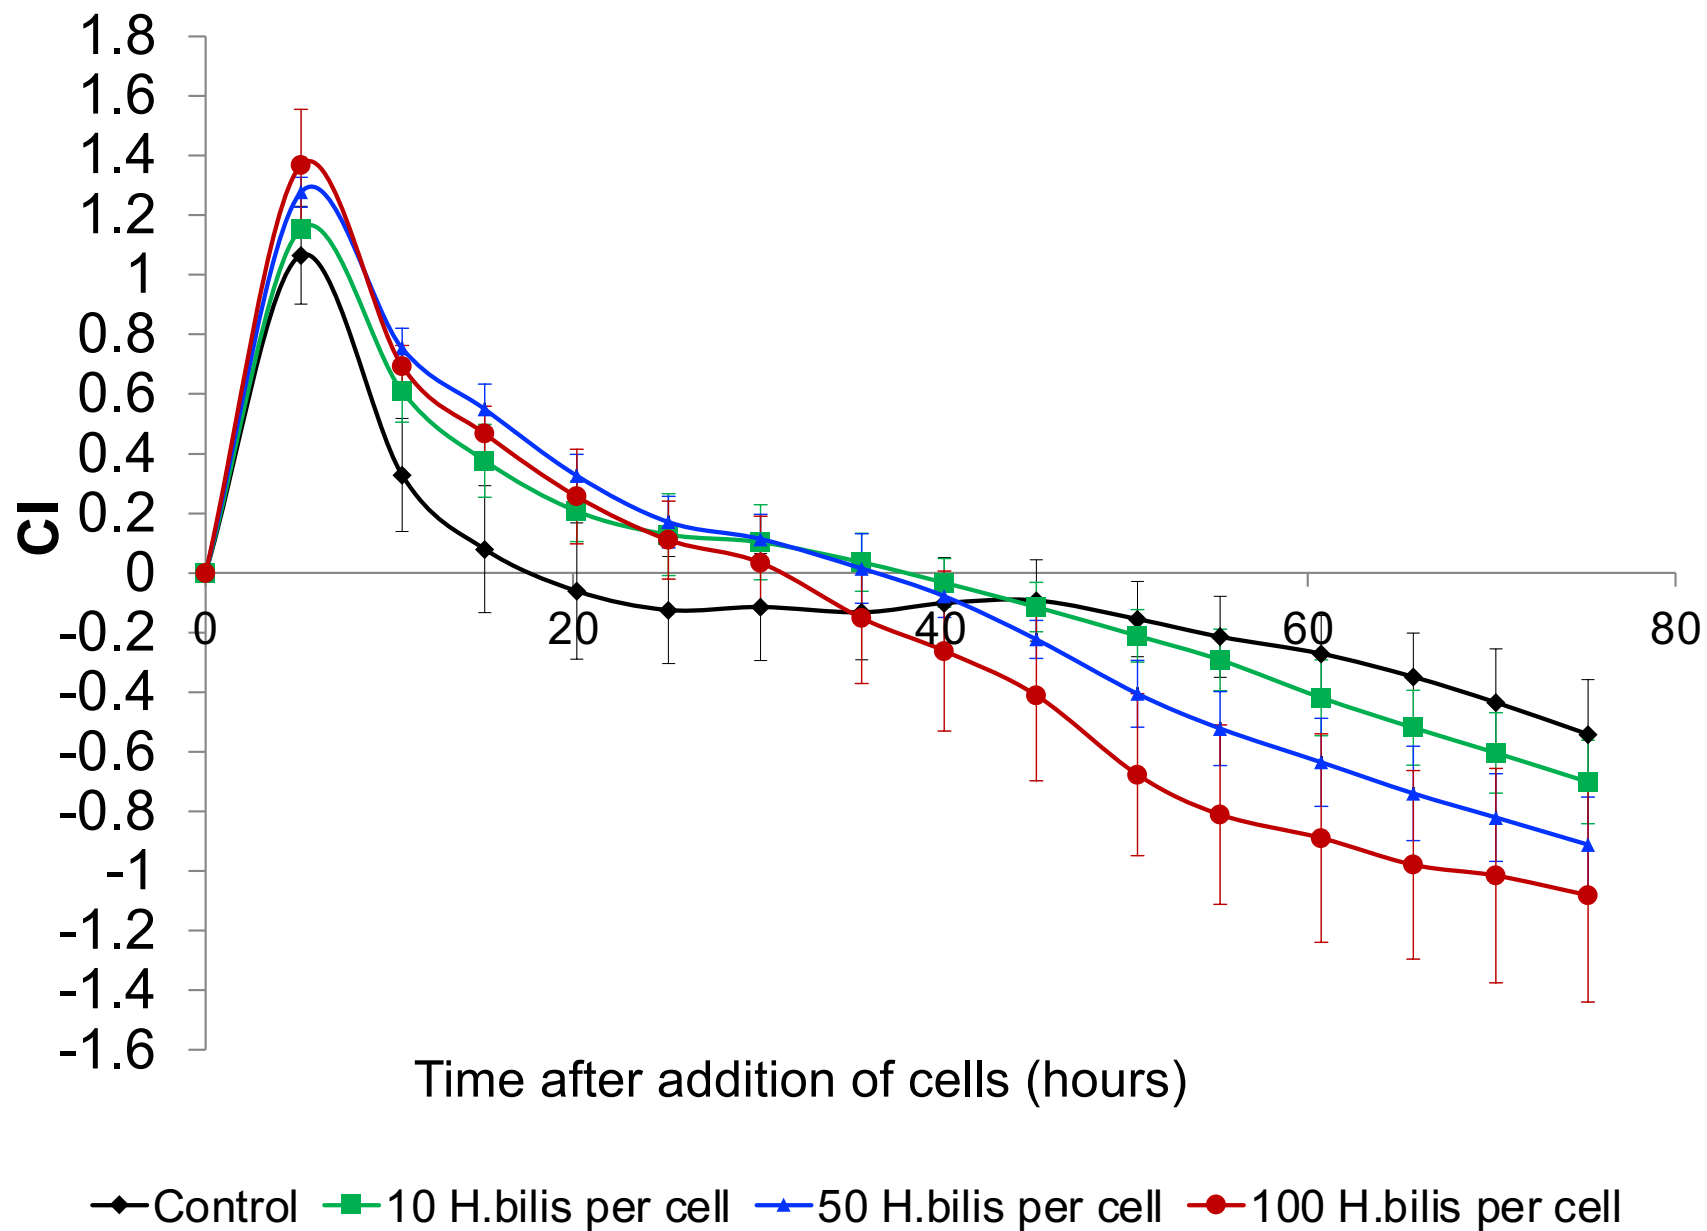

**Table S1.** Nucleotide sequences of primers specific for human EMT-associated and cancer stem cell maker genes.

| <b>Gene</b>      | <b>GenBank accession</b> | <b>Primer sequence, 5'-3'</b> | <b>Amplicon size (bp)</b> |
|------------------|--------------------------|-------------------------------|---------------------------|
| <b>CD24</b>      | NM_013230.3              | Forward CACCCAGCATCCTGCTAGAC  | 259                       |
|                  |                          | Reverse GAGACCACGAAGAGACTGGC  |                           |
| <b>CD44</b>      | NM_00610.3               | Forward GGGAGTCAAGAAGGTGGAGC  | 237                       |
|                  |                          | Reverse CTGAGACTTGCTGGCCTCTC  |                           |
| <b>F11r/Jam1</b> | NM_016946.5              | Forward GTGCCTACTCGGGCTTTTCT  | 201                       |
|                  |                          | Reverse GAGCTTGACCTTGACCTCCC  |                           |
| <b>Gapdh</b>     | NM_002046.5              | Forward CCCATGTTTCGTCATGGGTGT | 366                       |
|                  |                          | Reverse TTCTAGACGGCAGGTCAGGT  |                           |
| <b>MMP7</b>      | NM_002423.5              | Forward GGAGCTCATGGGACTCCTA   | 172                       |
|                  |                          | Reverse GGCCAAGTTCATGAGTTGCAG |                           |
| <b>Snai1</b>     | NM_005985.3              | Forward AGCTCTCTGAGGCCAAGGAT  | 325                       |
|                  |                          | Reverse GACATTCGGGAGAAGGTCCG  |                           |
| <b>Vimentin</b>  | NM_003380.5              | Forward GCAGGAGGCAGAAGAATGGT  | 216                       |
|                  |                          | Reverse GCAGCTTCAACGGCAAAGTT  |                           |
| <b>Zeb1</b>      | NM_001128128.2           | Forward CGCAGTCTGGGTGTAATCGT  | 477                       |
|                  |                          | Reverse CCATGCCCTGAGGAGAACTG  |                           |
